# Supplementary material for: Reconstruction of the Steroid 1(2)-Dehydrogenation System from Nocardioides simplex VKM Ac-2033D in Mycolicibacterium Hosts
Source: MDPI journal article supplement (doi:10.3390/microorganisms11112720), 2023-11-07
Supplement: s1 [file s1]

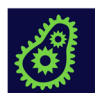

## Supplementary Material

# Reconstruction of the Steroid 1(2)-Dehydrogenation System from *Nocardioides simplex* VKM Ac-2033D in *Mycolicibacterium* Hosts

Svetlana R. Fufaeva, Dmitry V. Dovbnya, Tanya V. Ivashina, Andrei A. Shutov and Marina V. Donova \*

G. K. Skryabin Institute of Biochemistry and Physiology of Microorganisms, "Pushchino Scientific Center for Biological Research of the Russian Academy of Sciences", 142290 Pushchino, Russia; sfufaeva@list.ru (S.R.F.); anagoge@rambler.ru (D.V.D.); ivashina@ibpm.ru (T.V.I.); w\_\_w@rambler.ru (A.A.S.)

\* Correspondence: donova-marina@rambler.ru

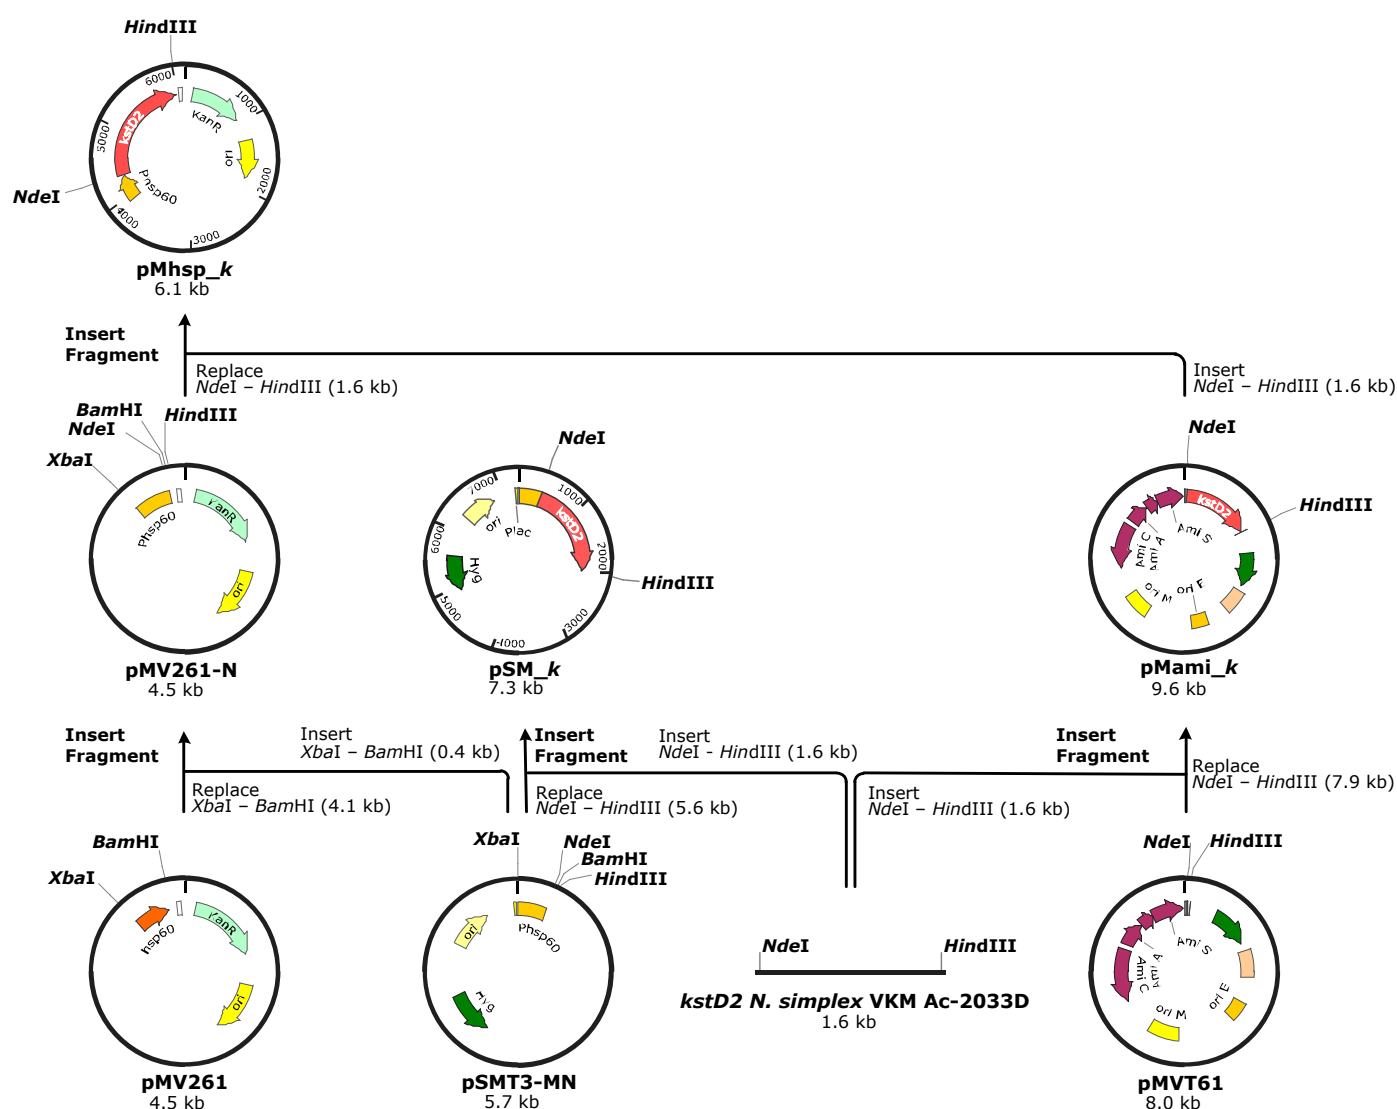

Figure S1. Graphical representation of the construction of recombinant expression plasmids pMhsp\_k, pMami\_k, and pSM\_k containing *kstD2<sub>NS</sub>*.

**Table S1.** PCR primer sequences used in this study.

| Primer   | Sequence 5'→3'                         | Introduced endonuclease restriction site |
|----------|----------------------------------------|------------------------------------------|
| kstD2nf  | TTATATCATATGTCCGACACACCGTGGA           | <i>NdeI</i>                              |
| kstD2nr  | ATTAAGCTTTCAGGCGGTGGCCGCGT             | <i>HindIII</i>                           |
| kstD2nf2 | TTATATCATATGCGAAAGTAACCCGTCATGTCCGACAC | <i>NdeI</i>                              |
| kstD2nf3 | CGTCATGTCCGACACACCGTGACCTGC            | -                                        |
| pMVNf    | GATGTACGTGGCGAACTCCG                   | -                                        |
| pMVNr    | CCCAGTCTTTCGACTGAGCC                   | -                                        |
| kstD2_1  | GACGTCGCTCCAGCTG                       | -                                        |
| kstD2_2  | TCGACCACGACATGGAC                      | -                                        |
| kstD2_3  | GTGAACGCGTCCTCGG                       | -                                        |
| T1R_r    | TCTTTCGACTGAGCCTTTCG                   | -                                        |
| Phsp60_f | GCCAGCGTAAGTAGCGG                      | -                                        |

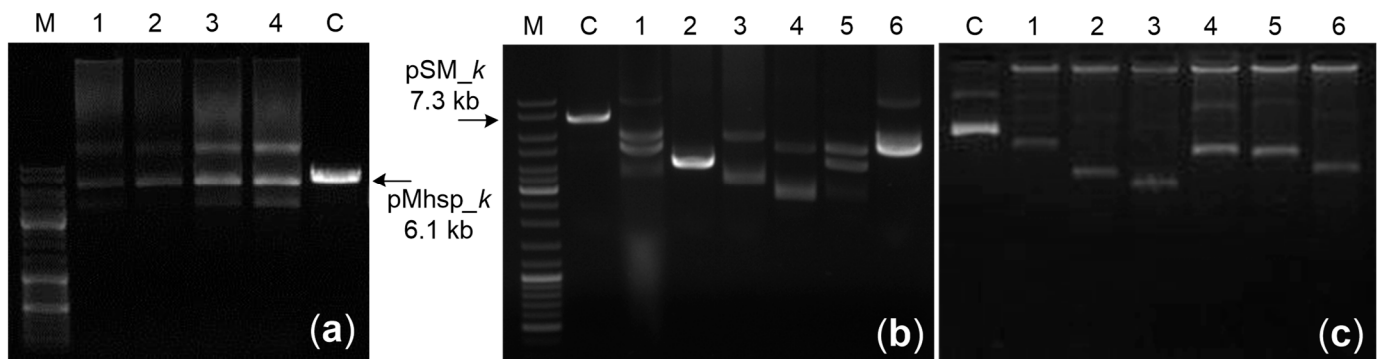

**Figure S2.** Analysis of plasmid DNA isolated from *Mycolicibacterium* Km<sup>R</sup>-transformants. (a) *NdeI*-site linearized plasmid DNA: from individual Km<sup>R</sup>-clones of *M. smegmatis* BD electroporated with pMhsp\_k (lanes 1 – 4); original plasmid pMhsp\_k from *E. coli* used for electroporation (lane C). (b) *HindIII*-site linearized plasmid DNA: pSM\_k from *E. coli* used for electroporation (lane C); from individual Hyg<sup>R</sup>-clones of *M. smegmatis* BD electroporated with pSM\_k (lanes 1 – 6). (c) Native plasmid DNA: pSM\_k from *E. coli* used for electroporation (C); from individual Hyg<sup>R</sup>-clones of *M. neoaurum* electroporated with pSM\_k (lanes 1 – 6). M – DNA ladder (Thermo Fisher Scientific, USA).

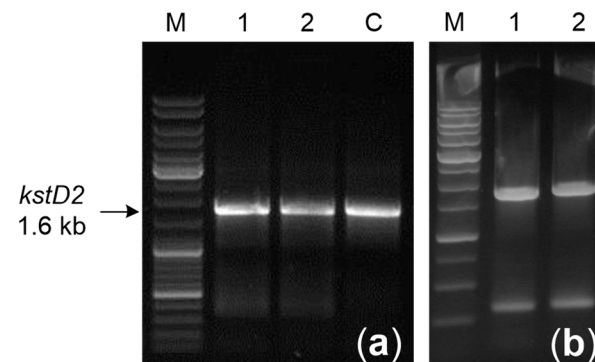

**Figure S3.** Confirmation of the presence of the *kstD2*<sub>NS</sub> gene insert (1.6 kb) by PCR analysis. (a) Individual Km<sup>R</sup>-clones of *M. smegmatis* BD bearing pMhsp\_k (lane 1) or pMami\_k (lane 2); C – amplicon from the original plasmid pMhsp\_k isolated from *E. coli*. (b) Individual Km<sup>R</sup>-clones of *M. neoaurum* B-3805Δ*kstD*, bearing pMami\_k. DNA ladder (Thermo Fisher Scientific, USA).

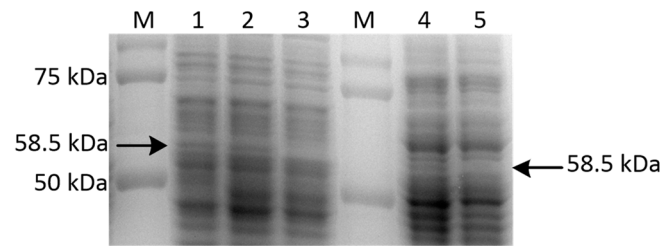

**Figure S4.** SDS-PAGE analysis of KsdD2 (58.5 kDa) in cell-free extracts of recombinant mycolicobacteria: acetamide-induced *M. neoaurum* B-3805 $\Delta$ kstD/pMami\_k (lane 1); negative control – acetamide-induced *M. neoaurum* B-3805 $\Delta$ kstD/pMVT61 (lane 2); *M. smegmatis* BD/pMhsp\_k (lane 3); acetamide-induced *M. smegmatis* BD/pMami\_k (lane 4); negative control – acetamide-induced *M. smegmatis* BD/pMVT61\_k (lane 5); M – Protein Ladder (Precision Plus Protein Dual Color Standards, Bio-Rad, USA).

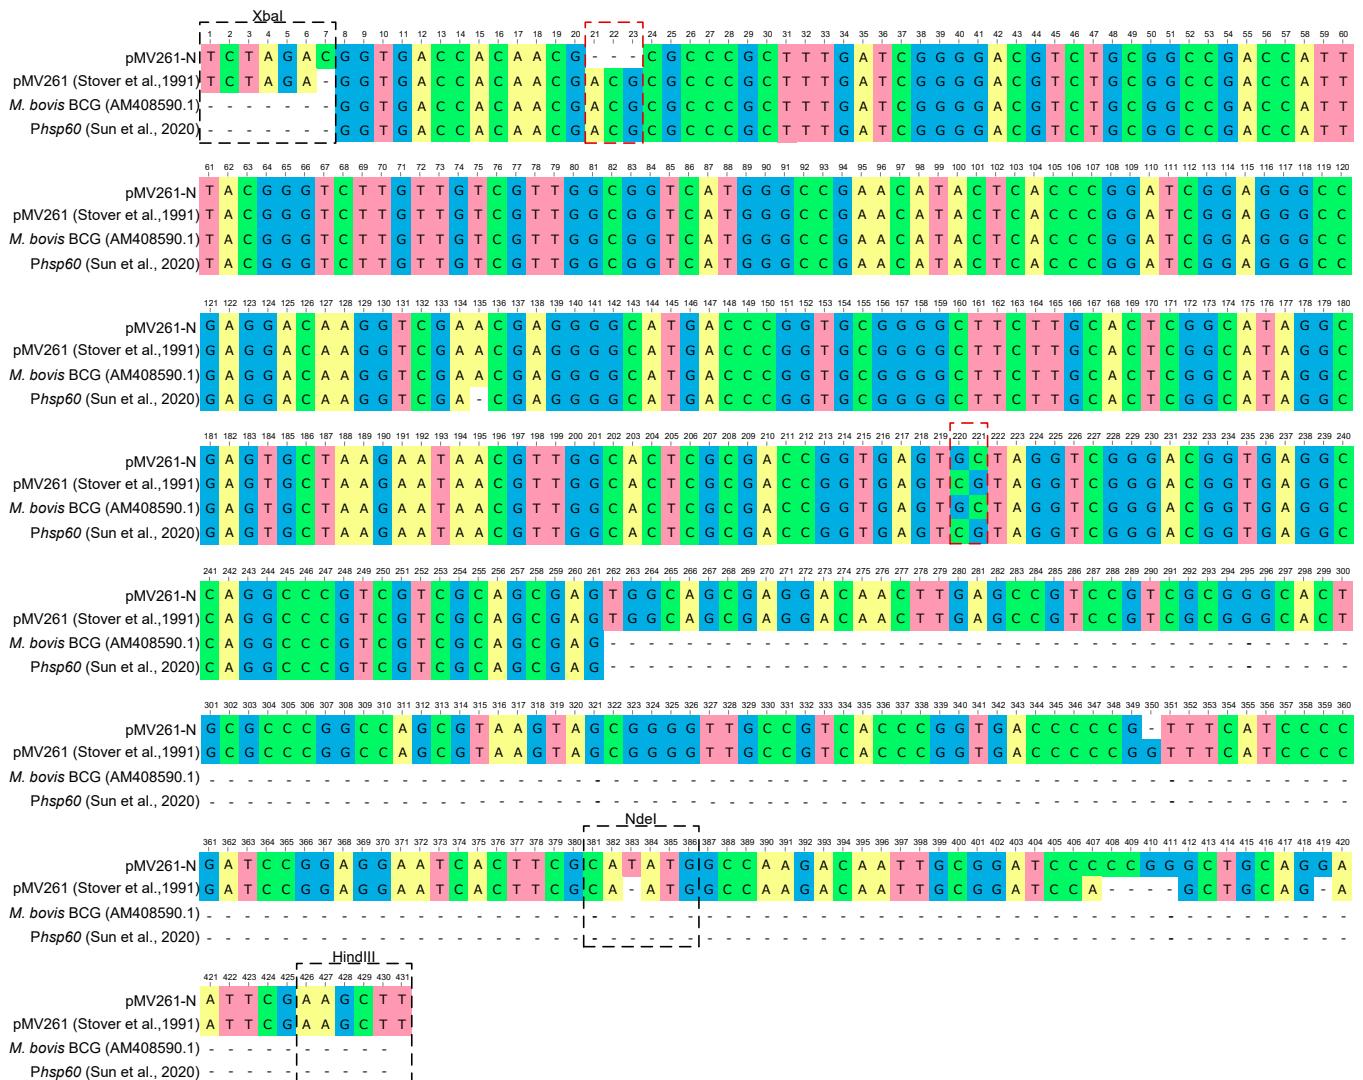

**Figure S5.** Multiple alignment of nucleotide sequences of the *XbaI-HindIII* fragment from the plasmids pMV261-N used in this work, pMV261 [41], *hsp60* promoter from *M. bovis* BCG Pasteur 1173P2 (GenBank: AM408590.1), and the sequence of *hsp60* promoter reported by Sun et al., 2020 [49].

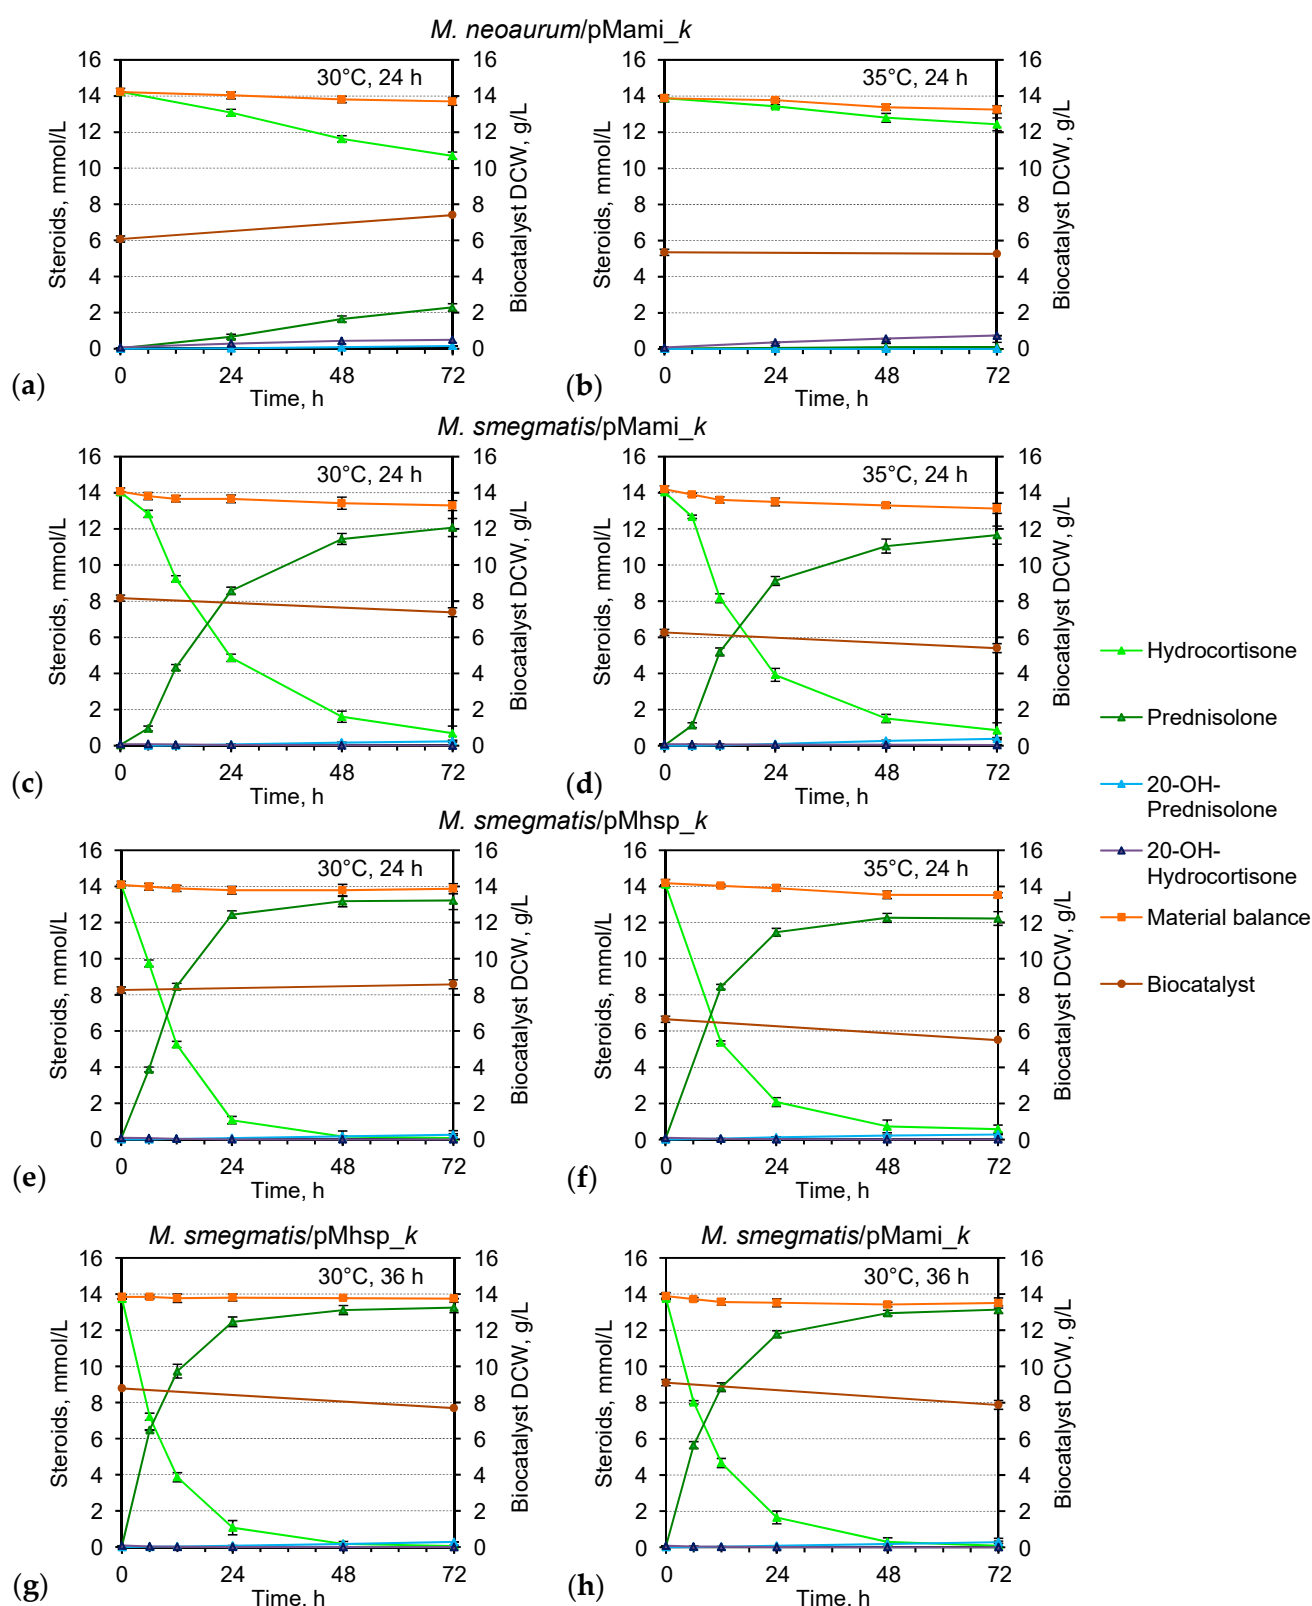

**Figure S6.** Dynamics of hydrocortisone biotransformation by the cells of *M. smegmatis* BD and *M. neoaurum* B-3805 $\Delta$ *kstD* bearing experimental plasmids and expressing *kstD2<sub>NS</sub>* under the control of acetamidase (a – d, h) or *hsp60* (e – g) promoters at 30°C (a, c, e, g, h) or 35°C (b, d, f). The cells were cultured in TR3 medium for 24 or 36 h, including 24-h acetamide induction, before the addition of the bioconversion substrate (hydrocortisone, 13.79 mmol/L). 20-OH-Hydrocortisone – 11 $\beta$ ,17 $\alpha$ ,20 $\beta$ ,21-tetrahydroxypregn-4-ene-3-one. 20-OH-Prednisolone – 11 $\beta$ ,17 $\alpha$ ,20 $\beta$ ,21-tetrahydroxypregna-1,4-diene-3-one.

**Table S2.** 20 $\beta$ -reductase activity of growing actinobacterial cells expressing *kstD*<sub>NS</sub> towards hydrocortisone.

| Strains                                         | Bioconversion condition                     |       | Max. 20 $\beta$ -reductase activity,<br>$\mu\text{mol}/(\text{h}\times\text{g})$ (DCW) |
|-------------------------------------------------|---------------------------------------------|-------|----------------------------------------------------------------------------------------|
|                                                 | Growth time before<br>substrate addition, h | t, °C |                                                                                        |
| <i>M. neoaurum</i> B-3805 $\Delta$ kstD/pMami_k | 24                                          | 30°C  | 1.54 $\pm$ 0.44                                                                        |
|                                                 | 24                                          | 35°C  | 2.17 $\pm$ 0.11                                                                        |
|                                                 | 36                                          | 30°C  | 1.67 $\pm$ 0.21                                                                        |
| <i>M. neoaurum</i> B-3805 $\Delta$ kstD/pMVT61  | 36                                          | 30°C  | 1.83 $\pm$ 0.38                                                                        |
|                                                 | 24                                          | 35°C  | 1.94 $\pm$ 0.59                                                                        |
| <i>M. smegmatis</i> BD/pMami_k                  | 24                                          | 30°C  | 0.41 $\pm$ 0.014                                                                       |
|                                                 | 24                                          | 35°C  | 1.52 $\pm$ 0.48                                                                        |
|                                                 | 36                                          | 30°C  | 0.48 $\pm$ 0.06                                                                        |
| <i>M. smegmatis</i> BD/pMVT61                   | 24                                          | 35°C  | 1.12 $\pm$ 0.22                                                                        |
|                                                 | 36                                          | 30°C  | 0.31 $\pm$ 0.007                                                                       |
| <i>M. smegmatis</i> BD/pMhsp_k                  | 24                                          | 30°C  | 0.45 $\pm$ 0.019                                                                       |
|                                                 | 24                                          | 35°C  | 0.52 $\pm$ 0.02                                                                        |
|                                                 | 36                                          | 30°C  | 0.45 $\pm$ 0.009                                                                       |
| <i>M. smegmatis</i> BD/pMV261-N                 | 24                                          | 35°C  | 0.95 $\pm$ 0.12                                                                        |
|                                                 | 36                                          | 30°C  | 0.22 $\pm$ 0.016                                                                       |
| <i>N. simplex</i> VKM Ac-2033D                  | 24                                          | 30°C  | 204.1 $\pm$ 31.3                                                                       |

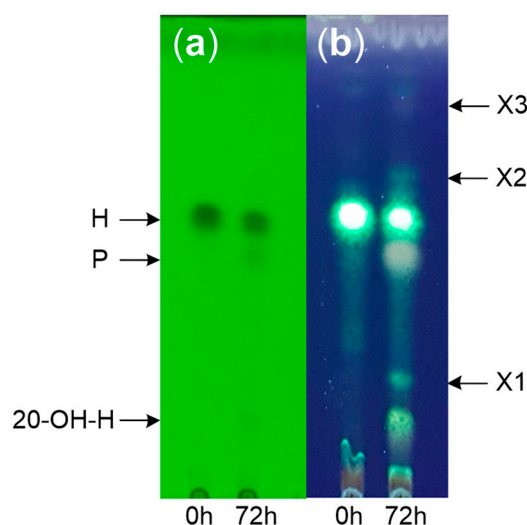**Figure S7.** Products of hydrocortisone bioconversion by *M. neoaurum* B-3805 $\Delta$ kstD/pMami\_k on TLC plate. (a) Visualization of spots under UV<sub>254</sub>. (b) Visualization of spots on the same plate at UV<sub>365</sub> after staining with MnCl<sub>2</sub>-reagent. H – hydrocortisone, P – prednisolone, 20-OH-H – 20-OH-hydrocortisone (11 $\beta$ ,17 $\alpha$ ,20 $\beta$ ,21-tetrahydroxypregn-4-ene-3-one), X1 – X3 – trace products suggested as intermediates of hydrocortisone degradation.

**Table S3.** Evaluation of the activity of 1(2)-hydrogenation of prednisolone by recombinant *Mycobacterium* cells (aged 36 h) bearing the control plasmids without *kstD2<sub>NS</sub>* insert at 30°C.

| <i>Mycobacterium</i> strain                    | Cultivation and bioconversion conditions |                             | Maximal specific steroid<br>1(2)-hydrogenase activity.<br>μmol/(h×g) (DCW) |
|------------------------------------------------|------------------------------------------|-----------------------------|----------------------------------------------------------------------------|
|                                                | Mixing speed rpm                         | Induction with<br>acetamide |                                                                            |
| <i>M. neoaurum</i> B-3805Δ <i>kstD</i> /pMVT61 | 200                                      | +                           | 0.196±0.015                                                                |
|                                                | 100                                      | +                           | 0.208±0.02                                                                 |
| <i>M. smegmatis</i> BD/pMVT61                  | 200                                      | +                           | 0.131±0.03                                                                 |
|                                                | 200                                      | -                           | 0.149±0.025                                                                |
|                                                | 100                                      | +                           | 0.134±0.03                                                                 |
